# Supplementary material
Source: PubMed Central journal article supplement (PMC1855418)

**A**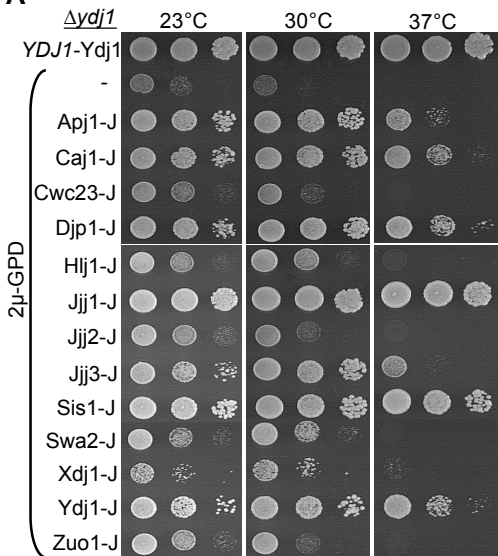**B**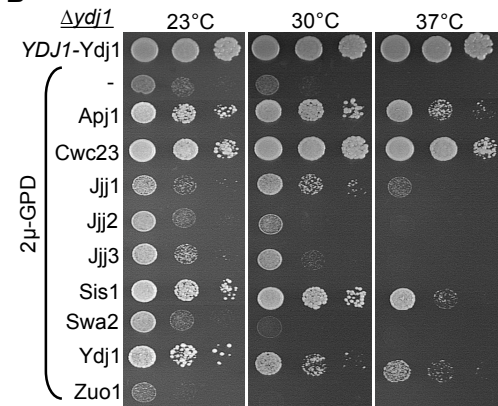**C**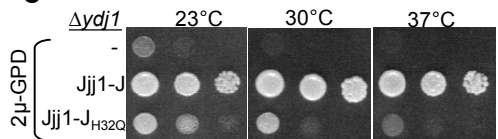

Supplement: pnas_0702357104_1.pdf [file pnas_0702357104_1.pdf]

**A**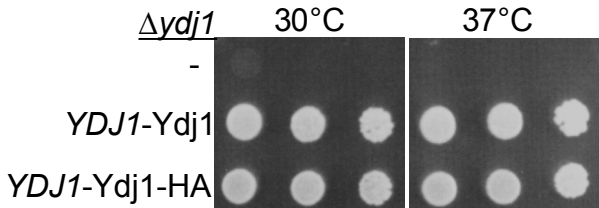**B**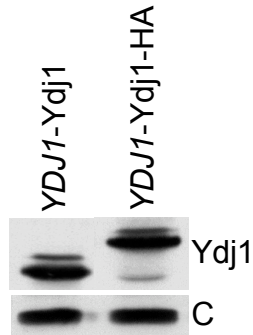**C**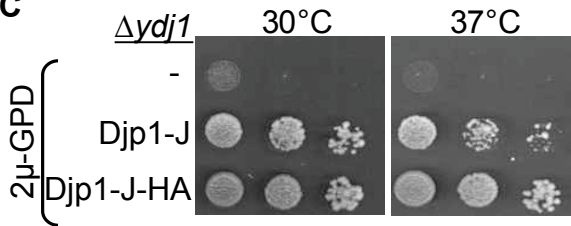

Supplement: pnas_0702357104_2.pdf [file pnas_0702357104_2.pdf]

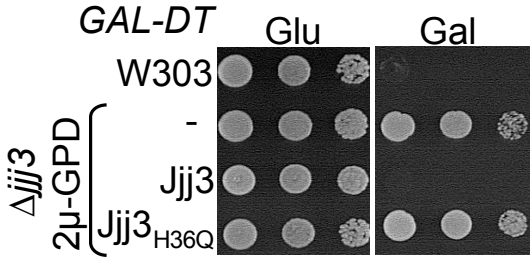

Supplement: pnas_0702357104_3.pdf [file pnas_0702357104_3.pdf]
